# Supplementary material for: Object detection in optical imaging of the Internet of Things based on deep learning
Source: PeerJ journal article supplement (doi:10.7717/peerj-cs.1718), 2023-12-11
Supplement: data.zip [file Figure 8-12.xlsx]

## Sheet: Sheet1
Figure 8
Frequency of training	LOSS	Frequency of training	ACC
1.18115	298.529	1.18115	-0.00366
9.88112	112.958	9.88112	0.01906
23.2642	93.3276	23.2642	0.04804
28.4625	91.1674	28.4625	0.08221
35.8393	90.0974	35.8393	0.11431
41.9117	90.1221	41.9117	0.13848
62.3991	90.1394	62.3991	0.17872
75.1181	90.1612	75.1181	0.21379
83.3793	90.1829	83.3793	0.24325
90.1325	90.2046	90.1325	0.26725
99.1478	90.2234	99.1478	0.29397
108.942	90.2408	108.942	0.30845
117.186	90.2639	117.186	0.3183
132.979	90.2813	132.979	0.33941
144.289	90.3045	144.289	0.36628
157.11	90.3262	157.11	0.3985
166.909	90.345	166.909	0.43634
177.465	90.3653	177.465	0.47418
188.775	90.3856	188.775	0.50661
194.104	90.4058	194.104	0.53619
201.603	89.3301	201.603	0.56328
212.902	89.346	212.902	0.57718
223.45	90.458	223.45	0.58769
233.995	90.4753	233.995	0.62274
244.548	90.4985	244.548	0.66042
257.366	89.4227	257.366	0.69823
266.425	90.5362	266.425	0.73874
277.735	90.5535	277.735	0.7712
286.772	90.5709	286.772	0.80361
297.325	90.5868	297.325	0.84415
307.873	90.6028	307.873	0.87922
318.429	90.6187	318.429	0.91165
331.244	90.6187	331.244	0.92656
Figure 9
Compare Project Names	Mean square error	Cross entropy
Accuracy	0.7	0.77
Precision	0.9	0.97
IOU	0.76	0.81
FPS	29.5	29.2
Figure 10
Compare Project Names	Mean square error	Cross entropy
Accuracy	0.88	0.87
Precision	0.79	0.91
IOU	0.73	0.73
FPS	33.8	30.1
Figure 11
Compare Project Names	Mean square error 1	Cross entropy 1	Two loss functions 1	Cross entropy 2
Accuracy	0.85	0.77	0.93	0.92
Precision	0.98	1	0.99	1
IOU	0.8	0.75	0.76	0.71
FPS	20.4	19.9	26.3	20.1
Figure 12
Compare Project Names	Accuracy	Precision ratio	IOU
Mean square error	0.97	0.99	0.75
Cross entropy	0.85	1	0.8
Two loss functions	0.98	0.99	0.83
